# Supplementary material for: Implementing the European Core Health Indicators (ECHI) in the Netherlands: an overview of data availability
Source: Arch Public Health. 2015 Mar 2;73(1):9. doi: 10.1186/s13690-014-0058-4 (PMC4349313; doi:10.1186/s13690-014-0058-4)
Supplement: Additional file 2: — 21 ECHI indicators unfinished at start JA for ECHIM.xls. The 21 ECHI indicators for which the indicator definition was lacking or for which no preferred data source was established yet at the start of the Joint Action for ECHIM. [file 13690_2014_58_MOESM2_ESM.xls]

## Sheet: Additional file 2
Title: The 21 ECHI indicators that were unfinished at start of the Joint Action for ECHIM.
Description: The 21 ECHI indicators for which the indicator definition was lacking or for which no preferred data source was established yet at the start of the Joint Action for ECHIM.
Unfinished ECHI indicators
15. Smoking-related deaths
16. Alcohol-related deaths
17. Excess mortality by extreme temperatures (formerly ‘by heat waves’)
32. Suicide attempt
36. Physical and sensory functional limitations
37. General musculoskeletal pain
38. Psychological distress
39. Psychological well-being
45. Pregnant women smoking
47. Hazardous alcohol consumption
52. Physical activity
61. Timing of first antenatal visits among pregnant women
65. Mobility of professionals
74. Medicine use, selected groups
81. Waiting times for elective surgeries
82. Surgical wound infections
83. Cancer treatment delay
84. Diabetes control
86. Policies on healthy nutrition
87. Policies and practices on healthy lifestyles
88. Integrated programmes in settings, including workplace, schools, hospital
