# Supplementary material for: Implementing the European Core Health Indicators (ECHI) in the Netherlands: an overview of data availability
Source: Arch Public Health. 2015 Mar 2;73(1):9. doi: 10.1186/s13690-014-0058-4 (PMC4349313; doi:10.1186/s13690-014-0058-4)
Supplement: Additional file 3: — 21 ECHI indicators with definition problems.xls. Description of the difference from the ECHI indicator definition for the 21 indicators that do not match the ECHI indicator definition. [file 13690_2014_58_MOESM3_ESM.xls]

## Sheet: Additional file 3
Title: Differences from the ECHI indicator definition for the 21 indicators with definition problems.
Description: Description of the difference from the ECHI indicator definition for the 21 indicators that do not match the ECHI indicator definition.
ECHI indicator	Data type (HIS, HES, register)	Description of difference
Indicators in international databases
12. Perinatal mortality	population register and Perinatal Registry	Dutch data include an age limit of ≥ 22 weeks gestational age, while ECHIM follows the WHO recommendation that data should be restricted to fetuses and infants weighting 1000 grams or more.
18. Selected communicable diseases	register (Osiris)	Data not available for all requested diseases: No Dutch data for Giardiasis and Yersiniosis because they are not notifiable disease in the Netherlands. Dutch data for Campylobacteriosis and Salmonellosis are present but not per 100.000 due to low coverage.
31. Injuries: workplace	HIS (LFS, ESAW)	For all Member States except the Netherlands administrative data (insurance-based systems and labour inspectorate-based reporting) are used. Dutch data are available from the NEA survey as a special module of the LFS.
41. Health expectancy, others	population register and HIS (EU-SILC)	Life expectancy without chronic disease at birth is not available, only life expectancy without chronic disease at age 16 and over. Life expectancy without chronic disease at birth is not calculated and published yet by JA EHLEIS and/or Eurostat.
62. Hospital beds	register (NZA)	Hospital beds in the Netherlands include beds for same day care and cots for healthy infants. In the Eurostat definition these beds are excluded.
63. Practising physicians	BIG register and SSB	Dutch data represent professionally active physicians. How many of them are immediately serving patients (i.e. practising physicians) is not known. However, ECHI requests practising physicians, but Dutch data for practising physicians are not available.
64. Practising nurses	BIG register and SSB	Dutch data represent professionally active nurses and caring professionals. How many of them are immediately serving patients (i.e. practising) is not known. However, ECHI requests practising nurses and caring professionals, but Dutch data for practising nurses and caring professionals are not available.
67. Hospital in-patient discharges, limited diagnoses	hospital discharge register (LMR/LBZ)	The Hospital Discharge Register (HDR, the 'Landelijke Medische Registratie' of Dutch Hospital Data) does not cover all hospitals required by ECHIM. Mental health and substance abuse hospitals are not included at all and also private and certain specialty hospitals (such as long-stay centres for rehabilitation and asthma treatment) are not included. Furthermore, "poliklinische bevallingen" or non-…
68. Hospital daycases, limited diagnoses	hospital discharge register (LMR/LBZ)	Idem
69. Hospital day-cases as percentage of total patient population	hospital discharge register (LMR/LBZ)	Idem. In addition, this indicator is not included in any of the international databases. It still has to be calculated.
70. Average length of stay (ALOS), limited diagnoses	hospital discharge register (LMR/LBZ)	Idem
73. Surgeries: PTCA, hip, cataract	hospital discharge register (LMR/LBZ)	The operations in the Dutch Hospital Discharge Register are not coded in ICD-9 CM, but with "Classificatie van verrichtingen" (ICPM-DE). The ICPM-DE is based on, but not identical to ICD-9-CM.
Indicators not (yet) available in international databases
21. (A) Diabetes, self-reported prevalence	national HIS (POLS/Gezondheidsenquête)	In the National HIS diagnosis is not confirmed and the question relates to whether people were treated for their condition during the past 12 months rather than affected by it.
23. (A) Depression, self-reported prevalence	national HIS (POLS/Gezondheidsenquête)	In the national HIS diagnosis is not confirmed and it is not clear whether the definition refers to chronic depression (note that EHIS does not specify this).
43. Blood pressure	national HIS (POLS/Gezondheidsenquête)	In the national HIS the diagnosis is not confirmed.
57. Influenza vaccination rate in elderly	national HIS (POLS/Gezondheidsenquête)	ECHI asks for vaccination during the last 12 months. The national HIS does not specifically ask whether the vaccination took place during the last 12 months, but this can be calculated based on the reported year and month of last vaccination. When the month of vaccination was unknown an assumption was made.
58. Breast cancer screening	national HIS (POLS/Gezondheidsenquête)	The national HIS specifically asks for participation in the screening programme, EHIS also covers mammographies taken at own/private initiative.
59. Cervical cancer screening	national HIS (POLS/Gezondheidsenquête)	The national HIS specifically asks for participation in the screening programme, EHIS also covers pap smears taken at own/private initiative. In the national HIS the recall period is 5 years, in EHIS 3 years.
71. (A) General practitioner (GP) utilisation	national HIS (POLS/Gezondheidsenquête)	The national HIS uses combined recall periods of 2 weeks and 2 months, EHIS uses 4 weeks.
71. (B) General practitioner (GP) utilisation	GP registry	Dutch data also include visits to general practice nurses.
72. (A) Selected outpatient visits	national HIS (POLS/Gezondheidsenquête)	For dentists/orthodontists and medical/surgical specialists the national HIS uses a recall period of 2 months, EHIS uses 4 weeks. The national HIS does not explicitly include orthodontists. The national HIS asks about visits to institutions providing mental health care, while EHIS asks for any visit to a psychologist or psychotherapist, so also for contacts with privately operating health care pr…
